# Supplementary material
Source: HighWire-hosted journal article supplement (https://bmjopen.bmj.com/content/9/6/e028631)
Supplement: inline-supplementary-material-1 [file inline-supplementary-material-1.pdf]

**Appendix 1.** Average trainee attrition per specialty, from 2010 through 2015

| <b>Specialty</b>                    | <b>Percentage (%)</b> |
|-------------------------------------|-----------------------|
| <i>Anaesthesiology</i>              | 8,2                   |
| <i>Emergency Medicine</i>           | 5,9                   |
| <i>Obstetrics and Gynaecology</i>   | 6,9                   |
| <i>Ophthalmology</i>                | 6,8                   |
| <i>Paediatrics and Child Health</i> | 4,7                   |
| <i>Pathology</i>                    |                       |
| Medical Microbiology                | 10,8                  |
| General pathology                   | 15,0                  |
| <i>Physicians (medicine)</i>        |                       |
| Cardiology                          | 11,9                  |
| Dermatology                         | 6,5                   |
| Internal Medicine                   | 11,3                  |
| Clinical genetics                   | 21,0                  |
| Geriatric medicine                  | 21,2                  |
| Respiratory medicine                | 16,3                  |
| Gastro-enterology                   | 6,9                   |
| Neurology                           | 8,4                   |
| Hospital Medicine                   | (n.a.)                |
| Rheumatology                        | 17,9                  |
| Rehabilitation medicine             | 17,5                  |
| Sport and exercise medicine         | 14,3                  |
| Nuclear medicine                    | 24,3                  |
| <i>Psychiatry</i>                   | 12,2                  |
| <i>Radiology</i>                    |                       |
| Clinical oncology                   | 15,8                  |
| Clinical radiology                  | 15,0                  |
| <i>Surgery</i>                      |                       |
| Oral and maxilla-facial surgery     | (n.a.)                |
| Cardio-thoracic surgery             | 14,6                  |
| General surgery                     | 8,4                   |
| Otolaryngology                      | 8,6                   |
| Neurosurgery                        | 13,9                  |
| Orthopaedic surgery                 | 10,7                  |
| Plastic and reconstructive surgery  | 2,2                   |
| Urology                             | 7,5                   |
| <b>Mean</b>                         | <b>10,9</b>           |

Data adapted from the Advisory Committee on Medical Manpower Planning: "Capaciteitsplan 2016: Deelrapport 1 Medische Specialismen" – <https://capaciteitsorgaan.nl/app/uploads/2016/04/Capaciteitsplan-2016-Deelrapport-1-DEF.pdf>. Published with permission.

## **Appendix 2.** Literature search strategy

### Pubmed

("Education, Medical, Continuing"[mesh] OR "Education, Medical, Graduate"[mesh] OR "Internship and Residency"[mesh] OR "residency education"[tw] OR "resident education"[tw] OR "residents education"[tw] OR "resident's education"[tw] OR "residency training"[tw] OR "resident training"[tw] OR "residents training"[tw] OR "resident's training"[tw] OR "resident trainings"[tw] OR "residents trainings"[tw] OR "resident's trainings"[tw] OR "hospital consultant"[tw] OR "hospital consultants"[tw] OR "residency program"[tw] OR "residency programs"[tw]) AND ("Student Dropouts"[mesh] OR "job satisfaction"[mesh] OR "dropout"[tw] OR "dropouts"[tw] OR "dropping out"[tw] OR "attrition"[tw] OR "attritions"[tw] OR "trainee loss"[tw] OR "trainee losses"[tw] OR "loosing trainees"[tw] OR "resident loss"[tw] OR "resident losses"[tw] OR "residents loss"[tw] OR "residents losses"[tw] OR "loosing residents"[tw] OR "loosing interns"[tw] OR "intern loss"[tw] OR "intern losses"[tw] OR "resident remediation"[tw] OR "residents remediation"[tw] OR "trainee satisfaction"[tw] OR "resident satisfaction"[tw] OR "job satisfaction"[tw] OR "career satisfaction"[tw] OR "successful resident"[tw] OR "successful residents"[tw] OR "failing residents"[tw] OR "failing resident"[tw] OR "successful trainee"[tw] OR "successful trainees"[tw] OR "failing trainees"[tw] OR "failing trainee"[tw] OR "loss of residents"[tw])

### ERIC and PsycINFO:

(medical) student/trainee/resident/doctors in training\* attrition, drop-out, retention, success, completion
